# Supplementary material
Source: ML conference proceedings conference paper supplement (https://openreview.net/forum?id=W_zI7o5i6XR)

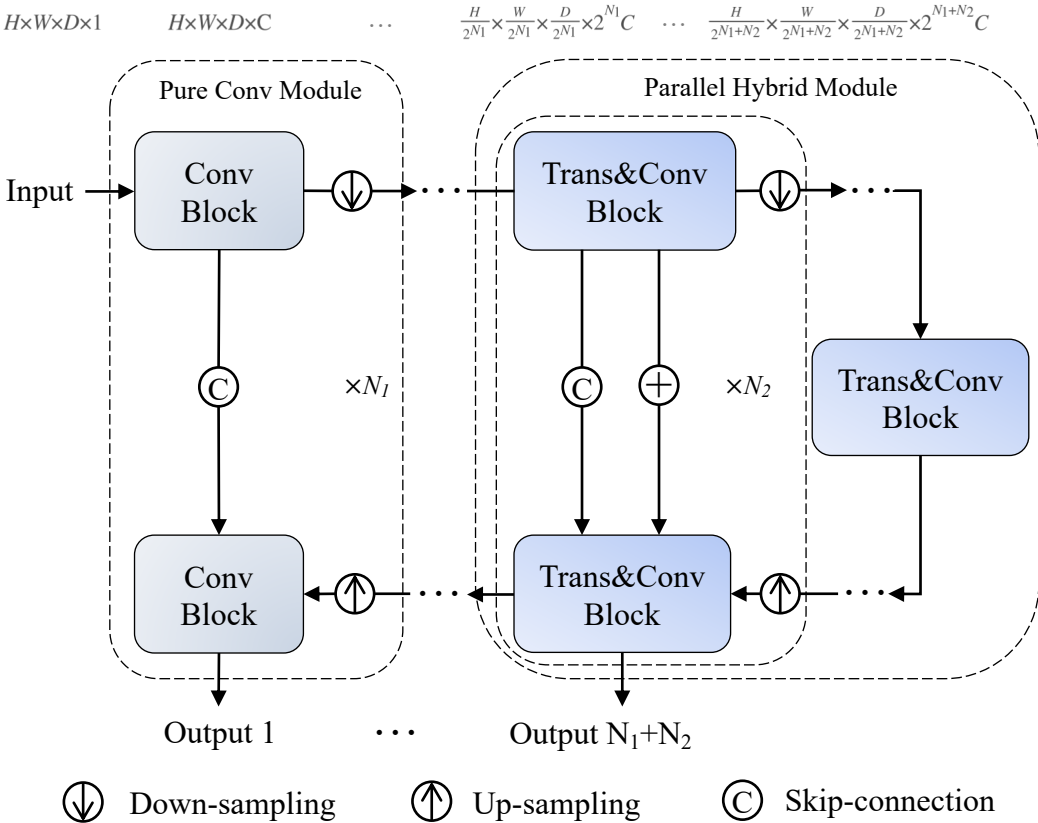

(a) Architecture

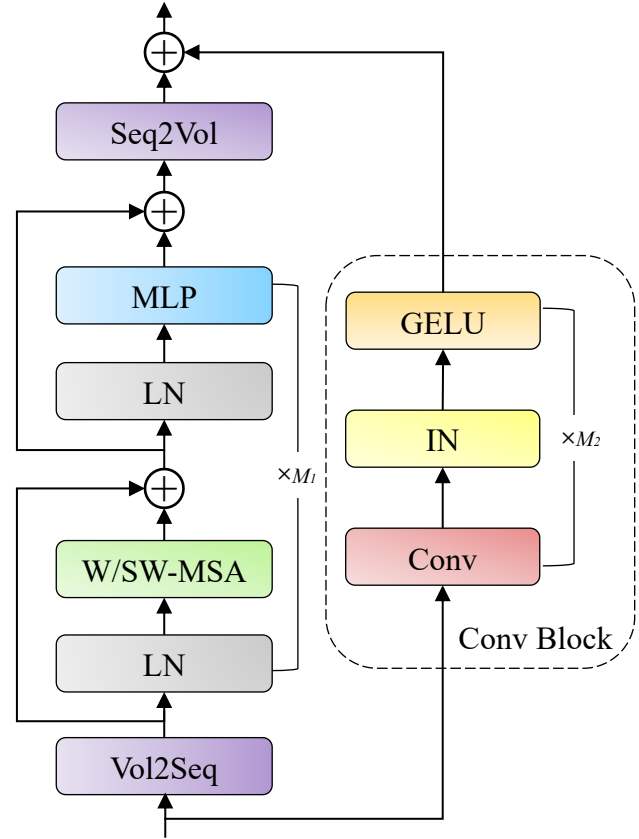

(b) Trans&Conv Block

Supplement: supplementary_material [file attachment]

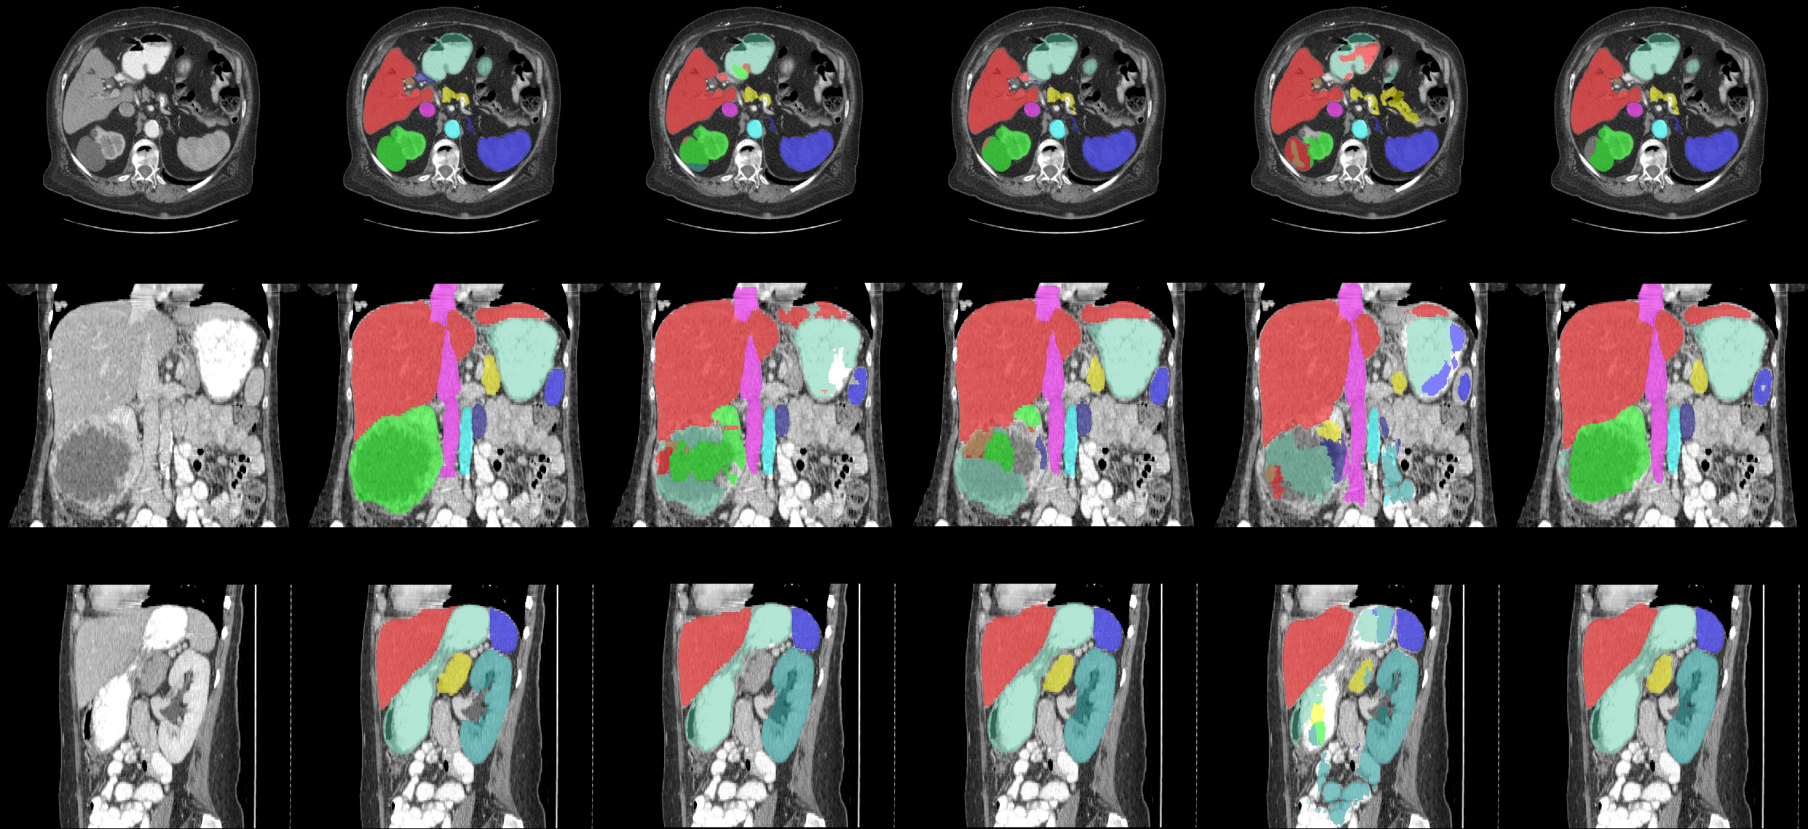

(a) Image

(b) Ground Truth

(c) nnU-Net

(d) nnU-Net+PHTrans

(e) Two stage+PHTrans

(f) Two stage+PHTrans+PD

Supplement: supplementary_material [file attachment]

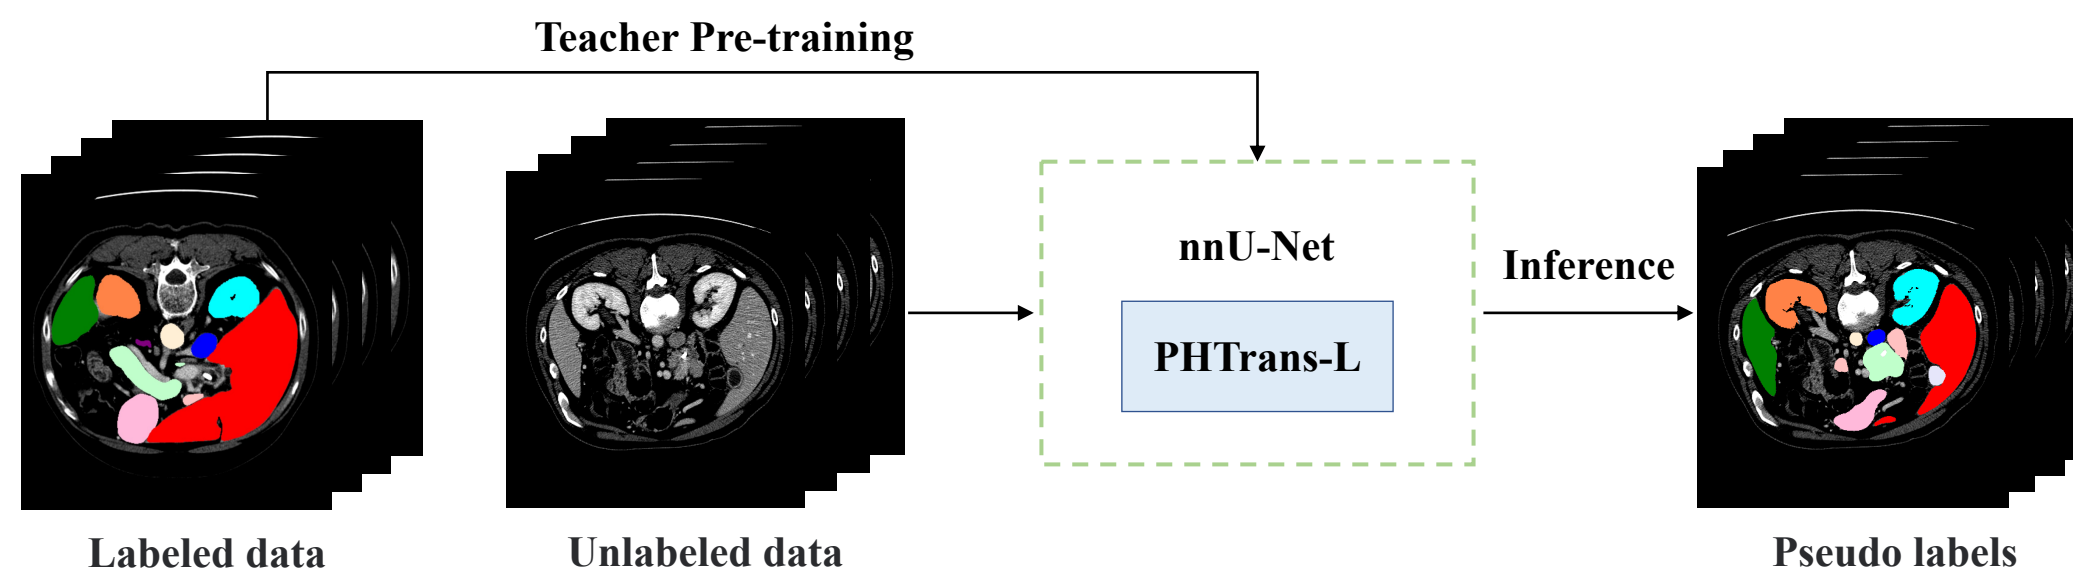

(a) Pseudo label generation strategy

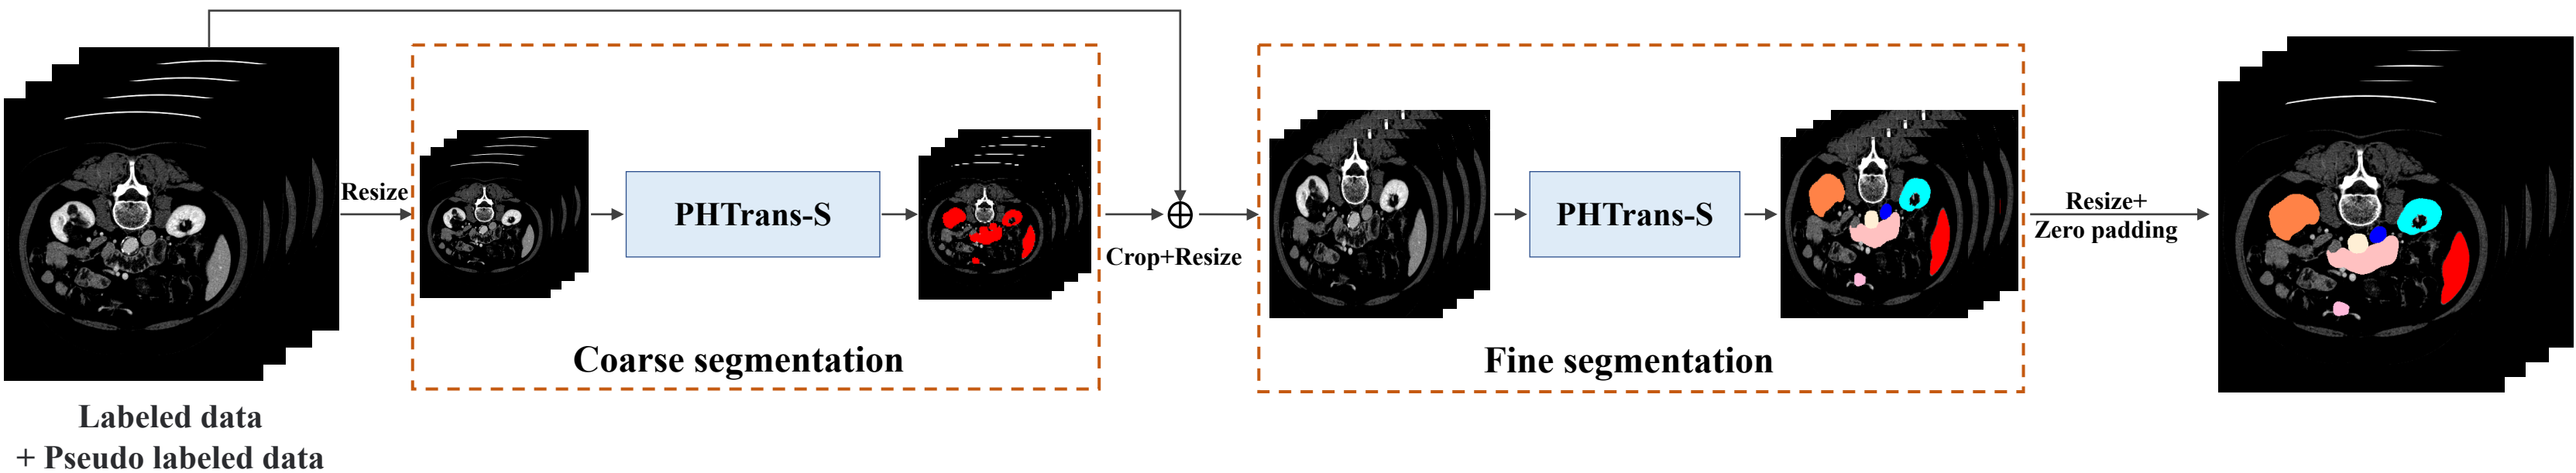

(b) Two-stage segmentation frame

Supplement: supplementary_material [file attachment]

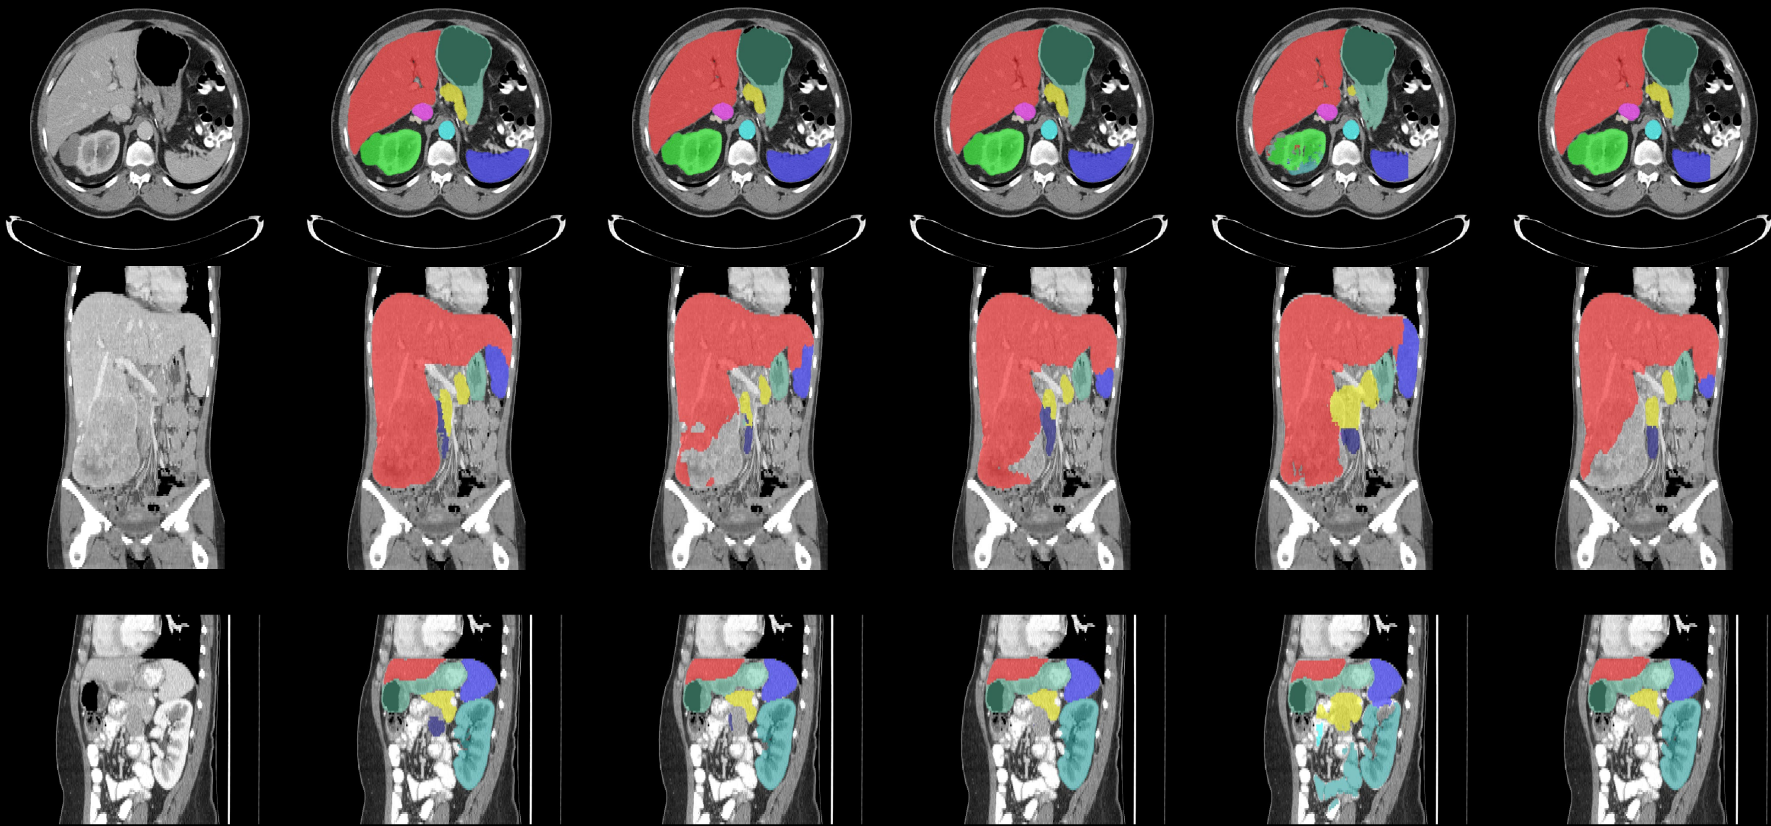

(a) Image

(b) Ground Truth

(c) nnU-Net

(d) nnU-Net+PHTrans

(e) Two stage+PHTrans

(f) Two stage+PHTrans+PD

Supplement: supplementary_material [file attachment]
